# Supplementary material for: Frequency of influenza H3N2 intra-subtype reassortment: attributes and implications of reassortant spread
Source: PubMed Central journal article supplement (PMC5200972; doi:10.1186/s12915-016-0337-3), 2016-12-29

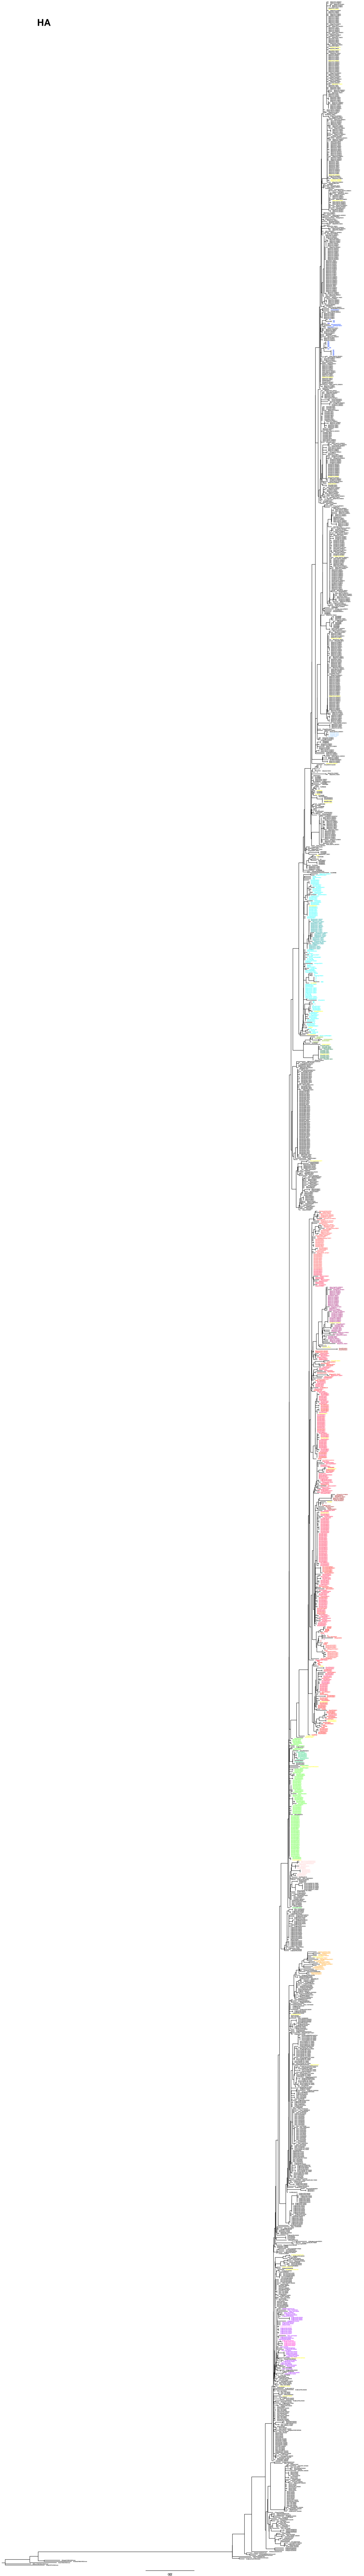

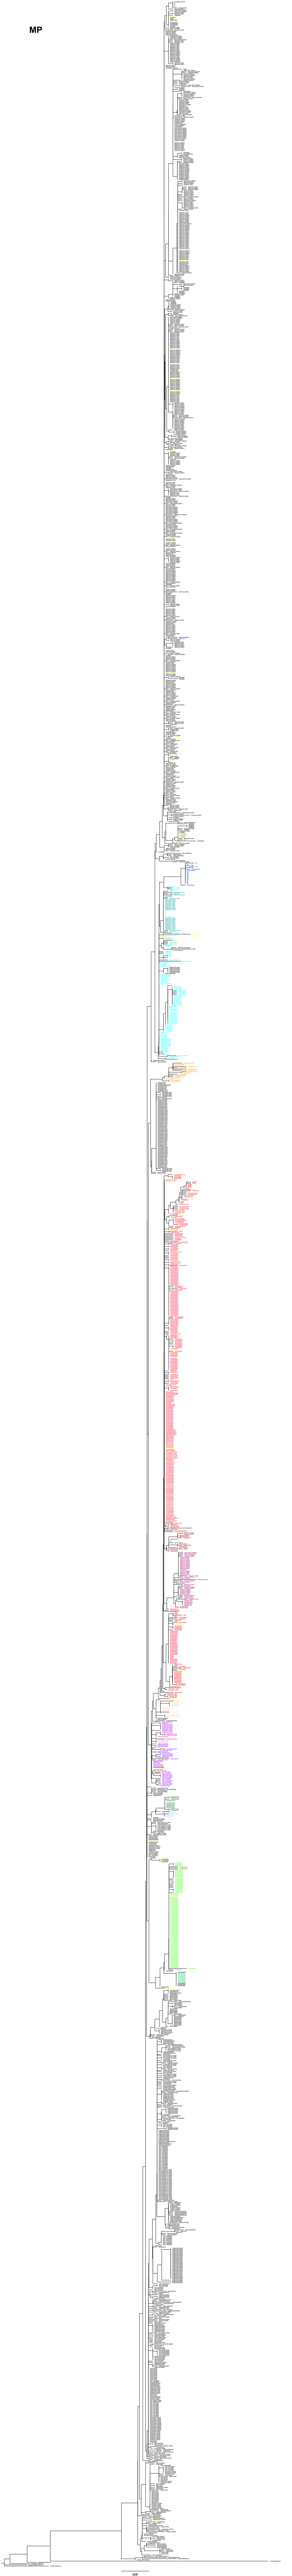

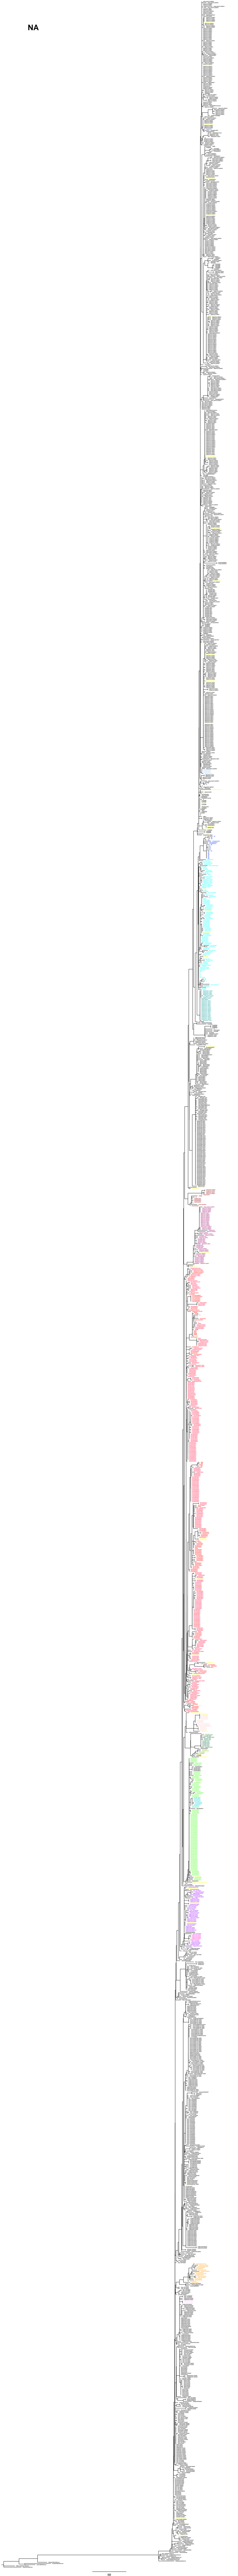

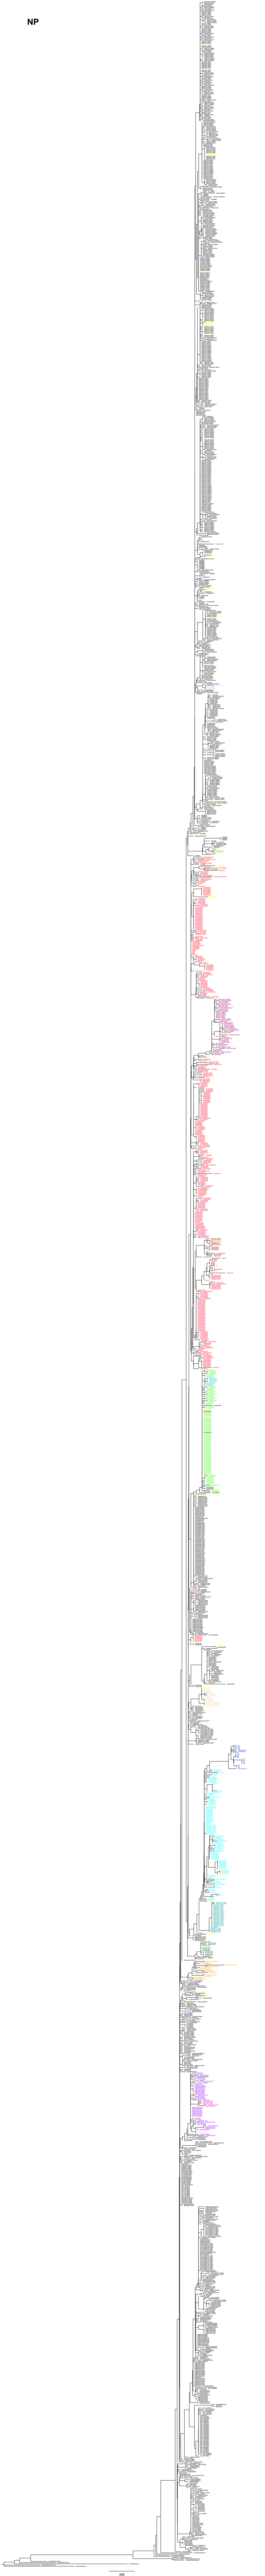

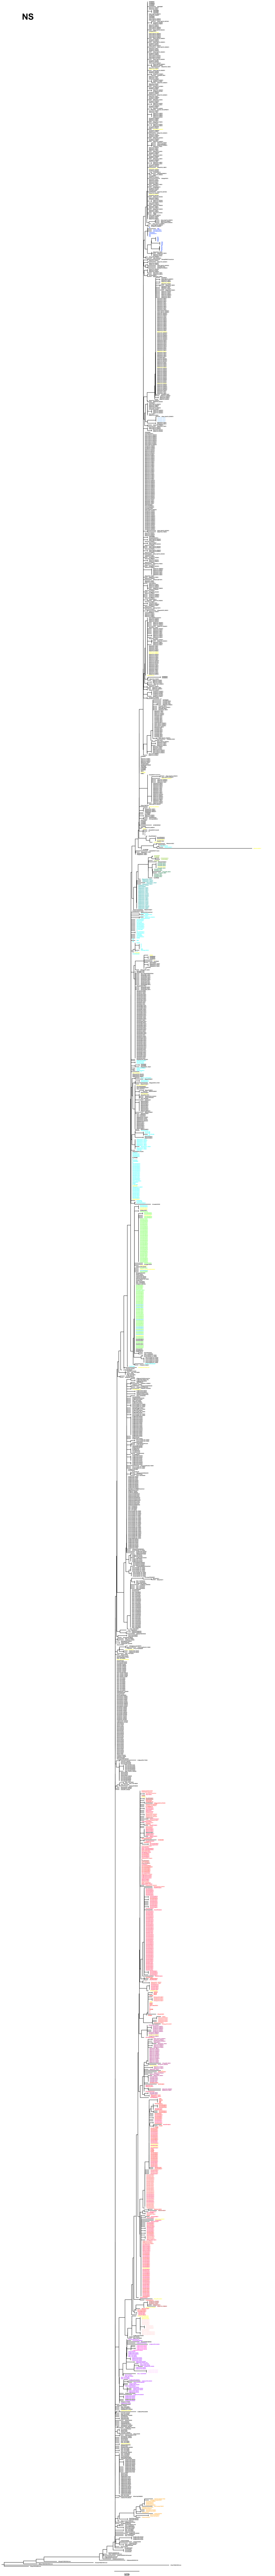

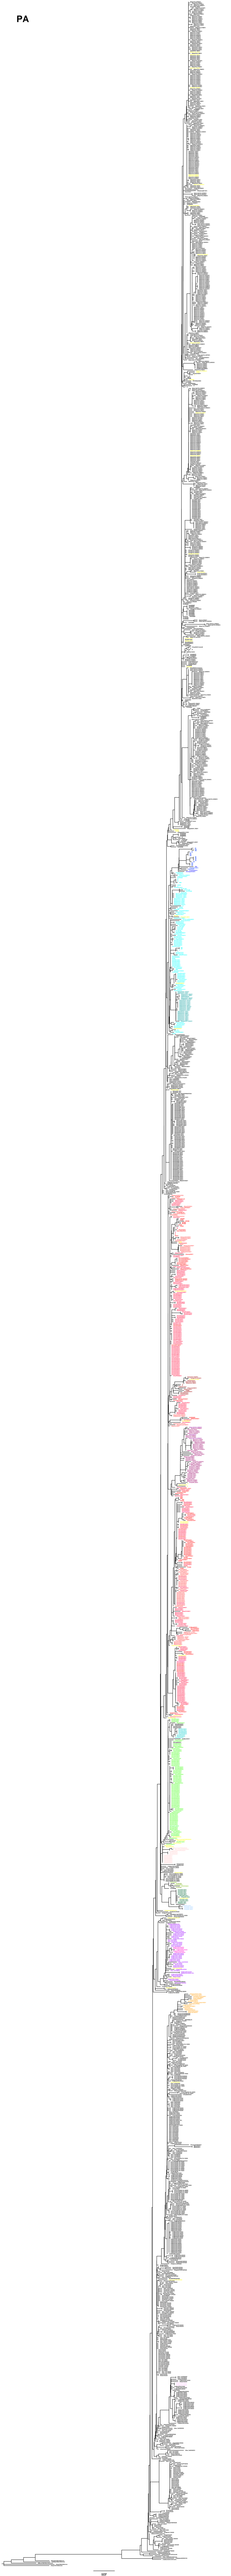

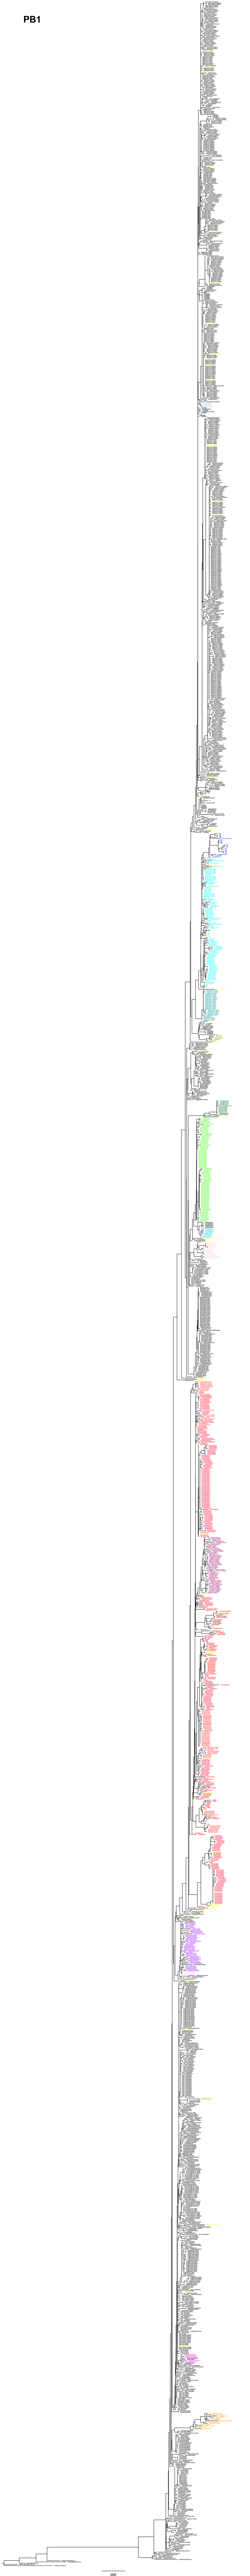

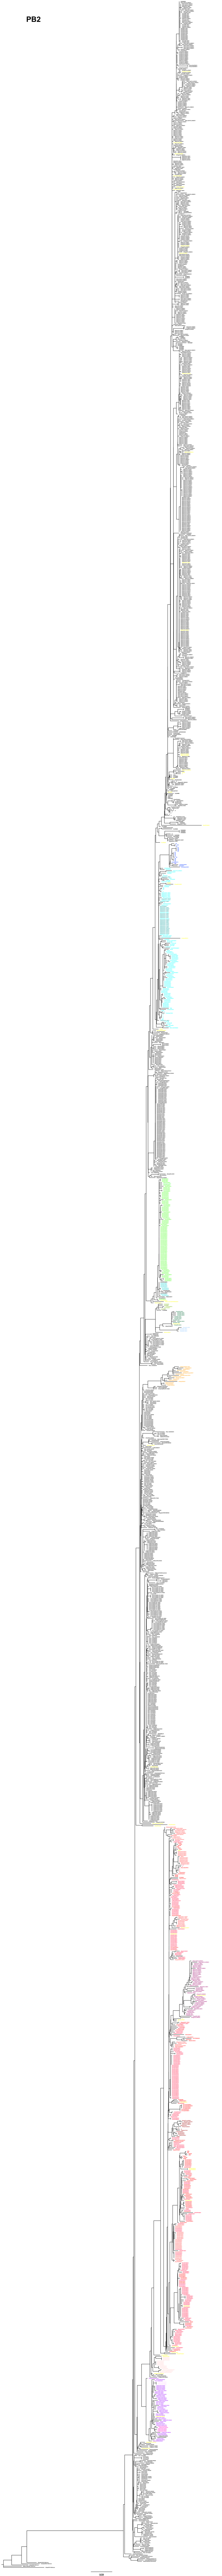

Supplement: 12915_2016_337_MOESM3_ESM.pdf [file 12915_2016_337_MOESM3_ESM.pdf]
